# Supplementary material for: CXCR6-Deficiency Improves the Control of Pulmonary Mycobacterium tuberculosis and Influenza Infection Independent of T-Lymphocyte Recruitment to the Lungs
Source: PubMed Central journal article supplement (PMC6416161; doi:10.3389/fimmu.2019.00339), 2019-03-07
Supplement: Data_Sheet_1.pdf [file Data_Sheet_1.pdf]

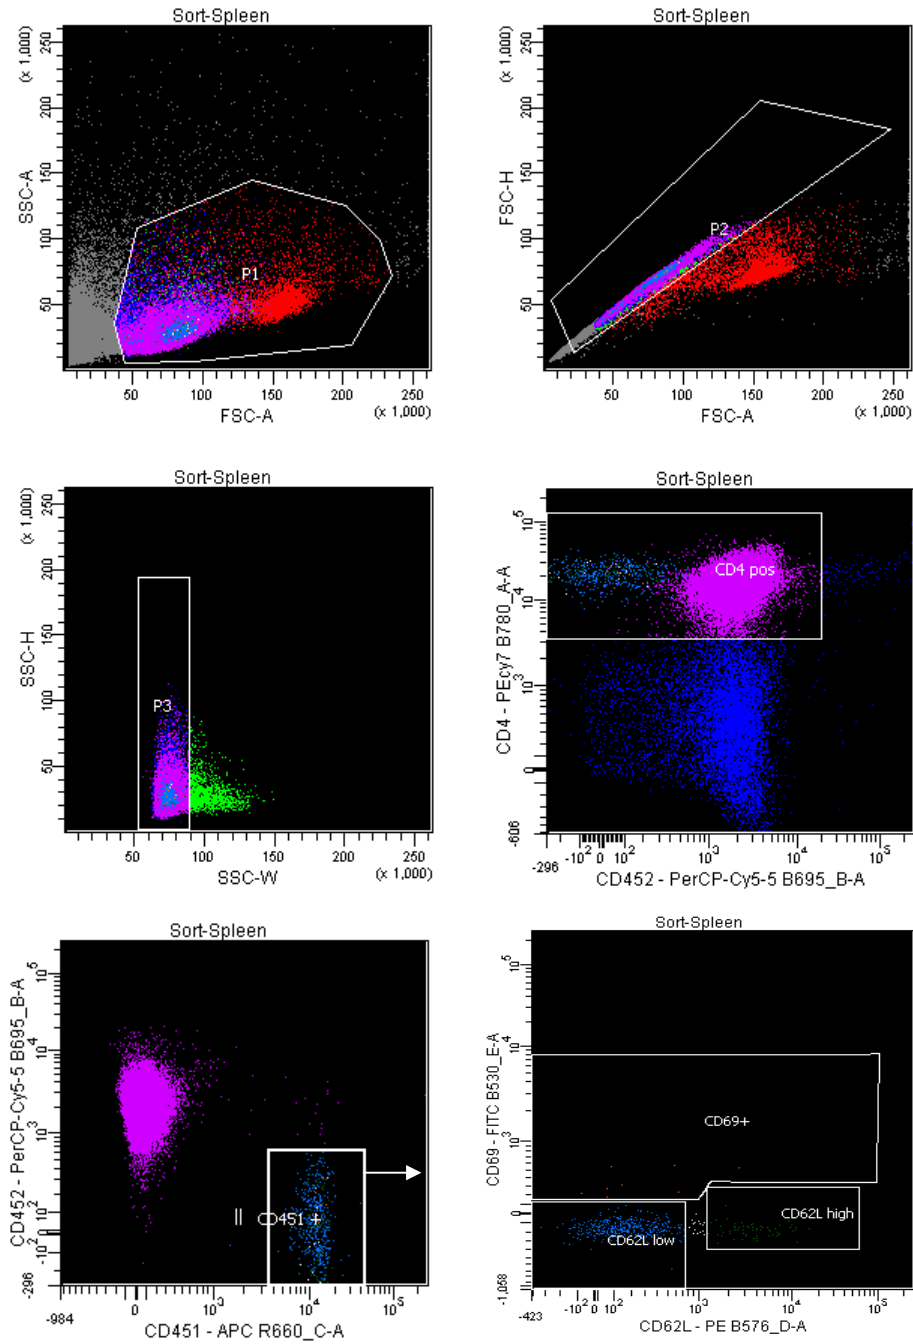

**Supplementary Figure 1. Gating strategy for sorting of memory P25-specific T-lymphocytes from the spleen.** 6 weeks following transfer of P25-specific CD45.1<sup>+</sup> CD4<sup>+</sup> T-lymphocytes (naïve) and intranasal infection with PR8-P25, transferred cells were purified from the spleens by sorting according to memory phenotype: spleen effector memory (S-EM, CD69<sup>-</sup>CD62L<sup>-</sup>) or spleen central memory (S-CM, CD69<sup>-</sup>CD62L<sup>+</sup>). Effector P25 cells (S-eff) were sorted at 11 days p.i (CD4<sup>+</sup> CD45.1<sup>+</sup>).

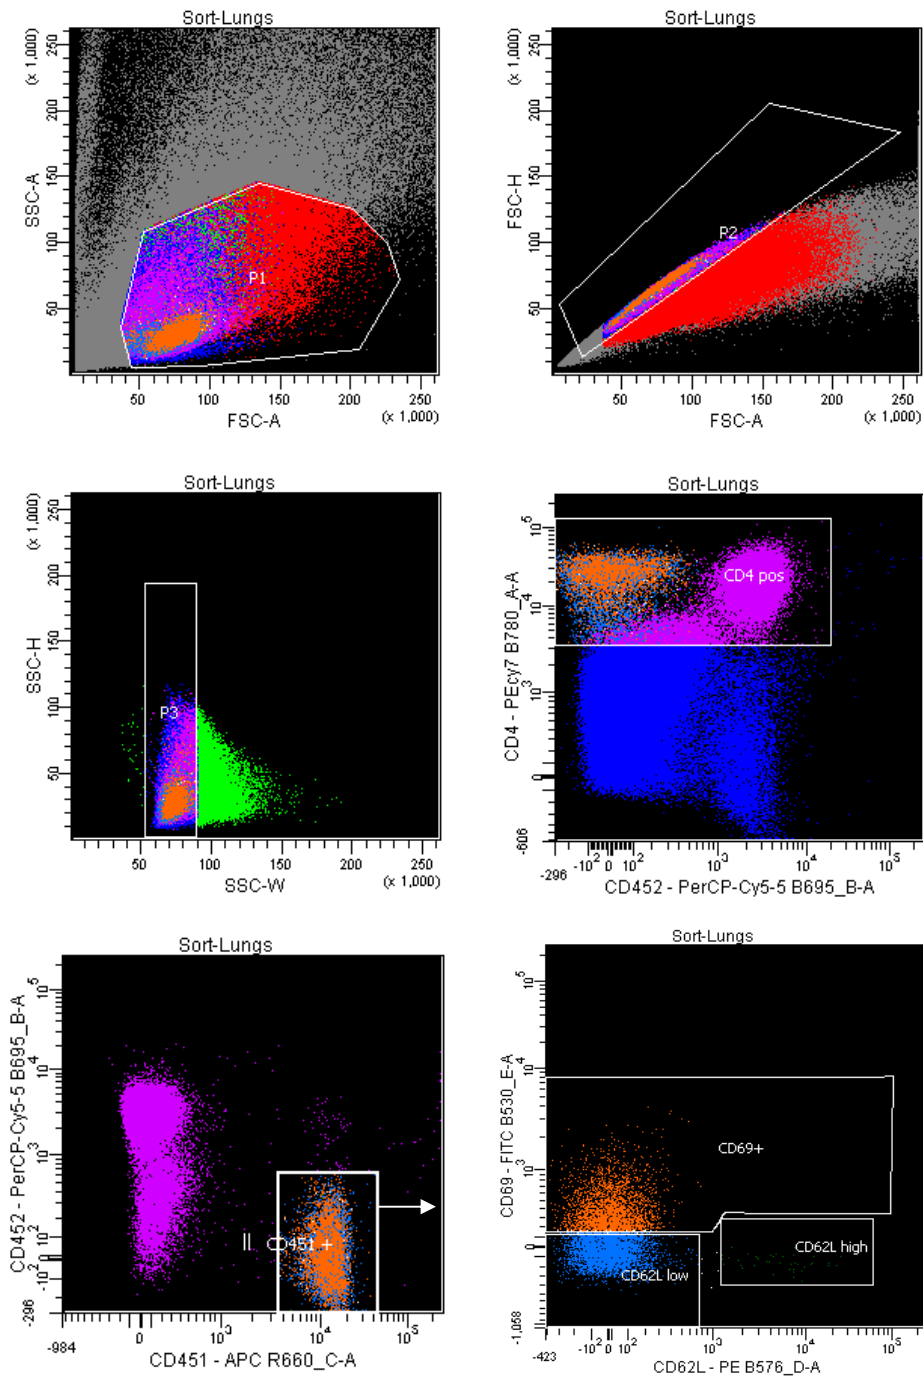

**Supplementary Figure 2. Gating strategy for sorting of memory P25-specific T-lymphocytes from the lungs.** 6 weeks following transfer of P25-specific CD45.1<sup>+</sup> CD4<sup>+</sup> T-lymphocytes (naïve) and intranasal infection with PR8-P25, transferred cells were purified from the lungs by sorting according to memory phenotype: lung effector memory (L-EM, CD69<sup>-</sup>CD62L<sup>-</sup>) or lung resident memory (L-RM, CD69<sup>+</sup>).

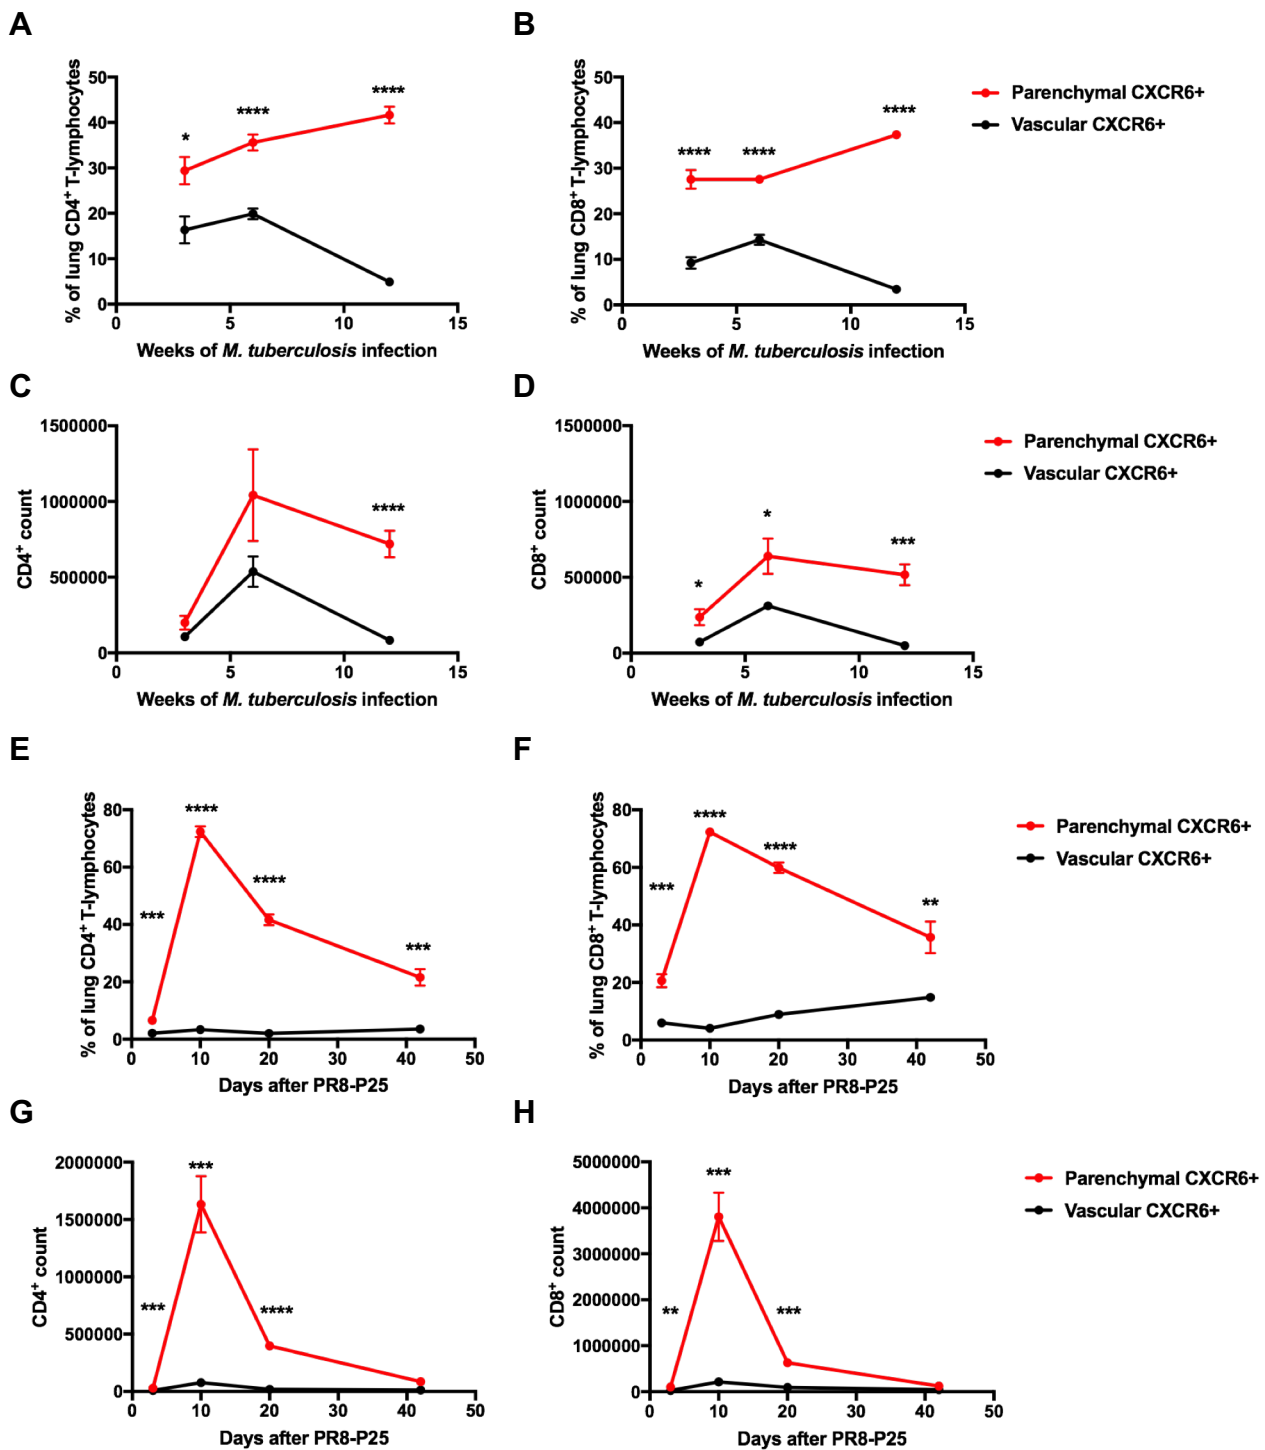

**Supplementary Figure 3. Kinetics of lung CXCR6<sup>+</sup> CD4<sup>+</sup> and CD8<sup>+</sup> T-lymphocytes after pulmonary infection.** CXCR6<sup>+</sup> CD4<sup>+</sup> and CD8<sup>+</sup> T-lymphocytes were quantitated in CXCR6-reporter mice in the lung parenchyma (red) or vasculature (black). Frequency of CXCR6<sup>+</sup> (A) CD4<sup>+</sup> and (B) CD8<sup>+</sup> T-lymphocytes, or number of CXCR6<sup>+</sup> (C) CD4<sup>+</sup> and (D) CD8<sup>+</sup> T-lymphocytes at 3, 6 or 12 weeks after *M. tuberculosis* infection (n=5). Frequency of CXCR6<sup>+</sup> (E) CD4<sup>+</sup> and (F) CD8<sup>+</sup> T-lymphocytes, or number of CXCR6<sup>+</sup> (G) CD4<sup>+</sup> and (H) CD8<sup>+</sup> T-lymphocytes at 3, 10, 20 or 42 days after PR8-P25 infection (n=4-5). Data are the means ± SEM. The statistical significance of differences between parenchymal and vascular cells at each time point were analysed by multiple t tests with correction for multiple comparisons using the Holm-Sidak method (\*p<0.05, \*\*p<0.01, \*\*\*p<0.001, \*\*\*\*p<0.0001).

**A**

**3 weeks**

**WT**

**KO**

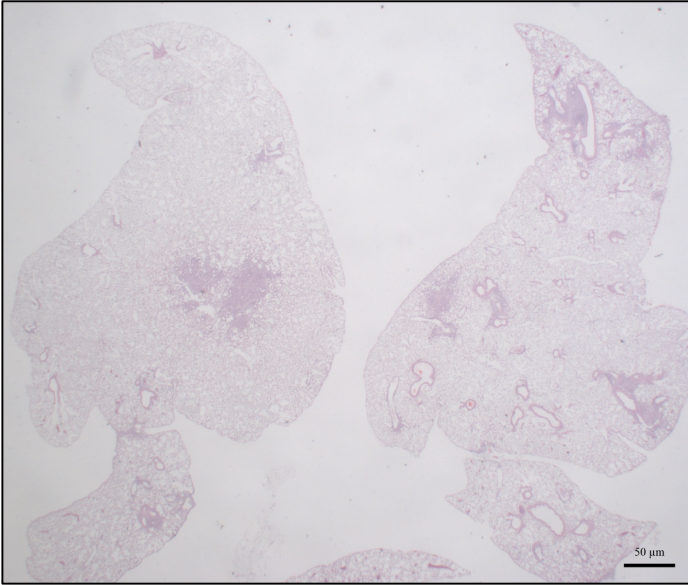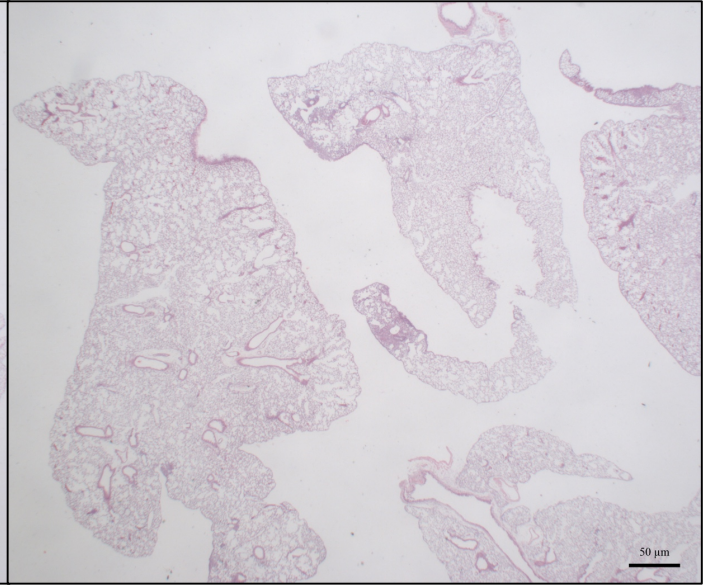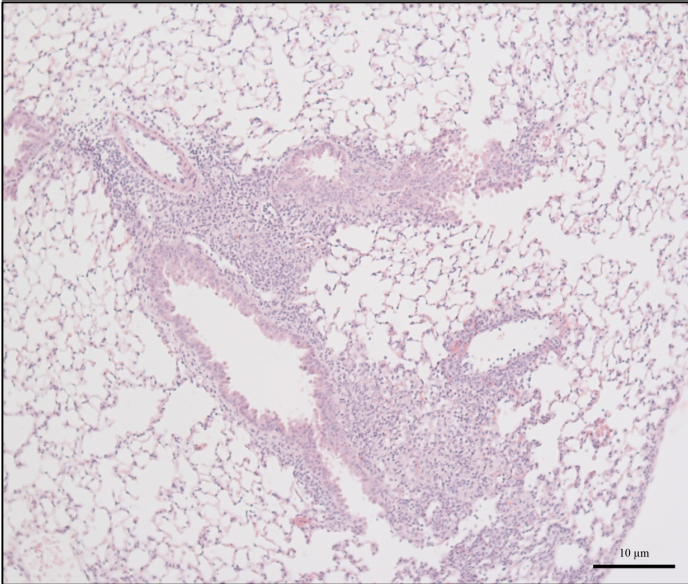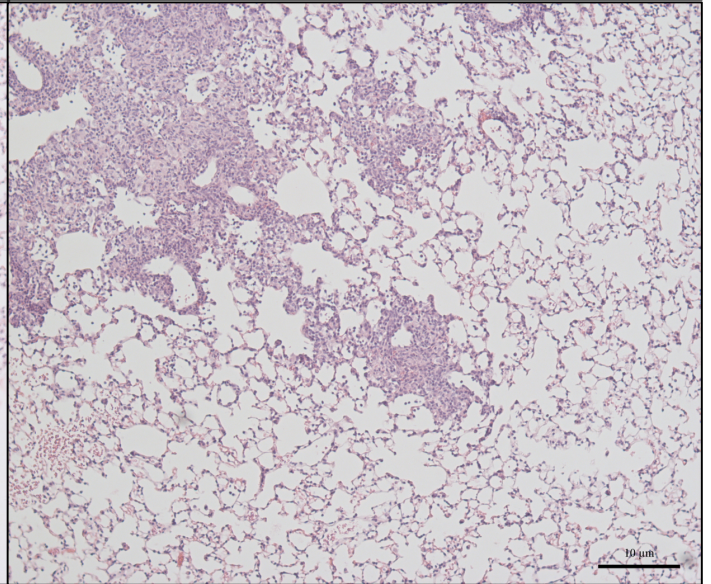



**B**

**6 weeks**

**WT**

**KO**

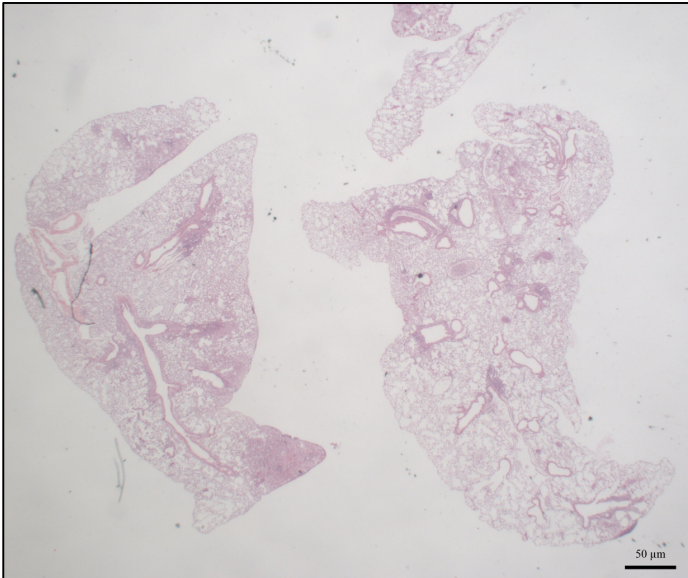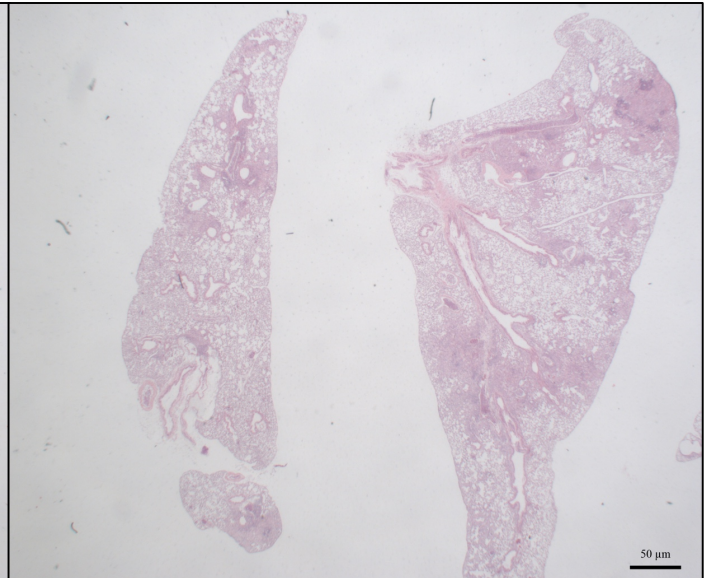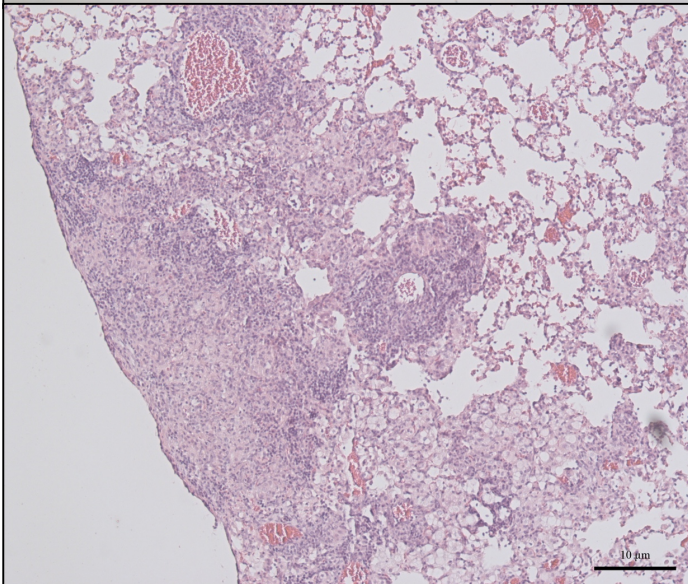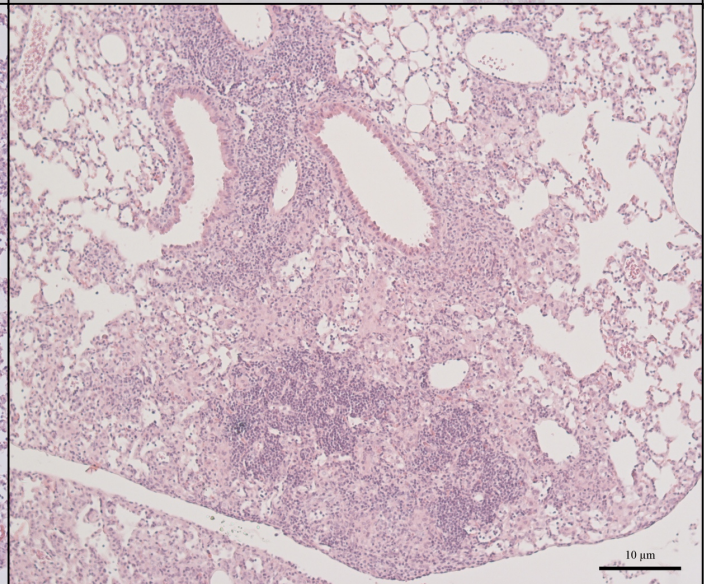



**C****12 weeks****WT****KO**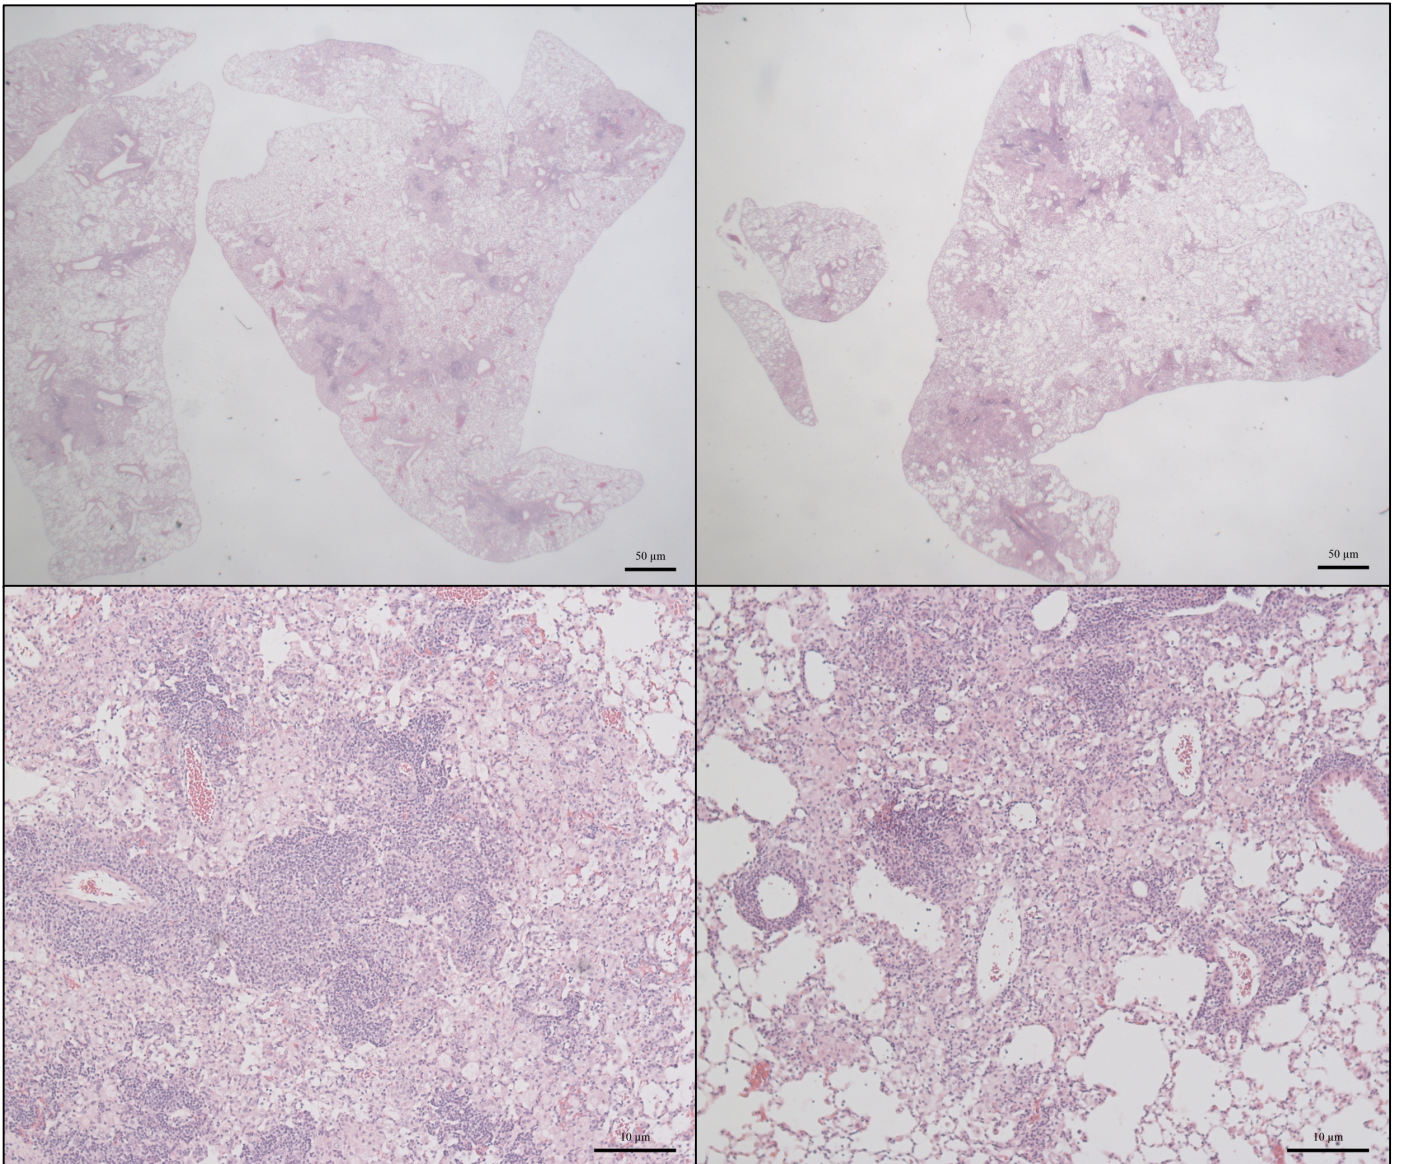

**Supplementary Figure 4. Lung histology of CXCR6<sup>WT</sup> and CXCR6<sup>KO</sup> mice after *M. tuberculosis* infection.** CXCR6<sup>WT</sup> and CXCR6<sup>KO</sup> mice (n=5) were infected with *M. tuberculosis* (100 CFU), and hematoxylin and eosin stained lung sections were examined at (A) 3 (B) 6 and (C) 12-weeks post infection. Representative images at 12.5x (top row, 500 μm scale bar) and 100x (bottom row, 100 μm scale bar) magnification are shown.



**A**

**Day 3**

**WT**

**KO**

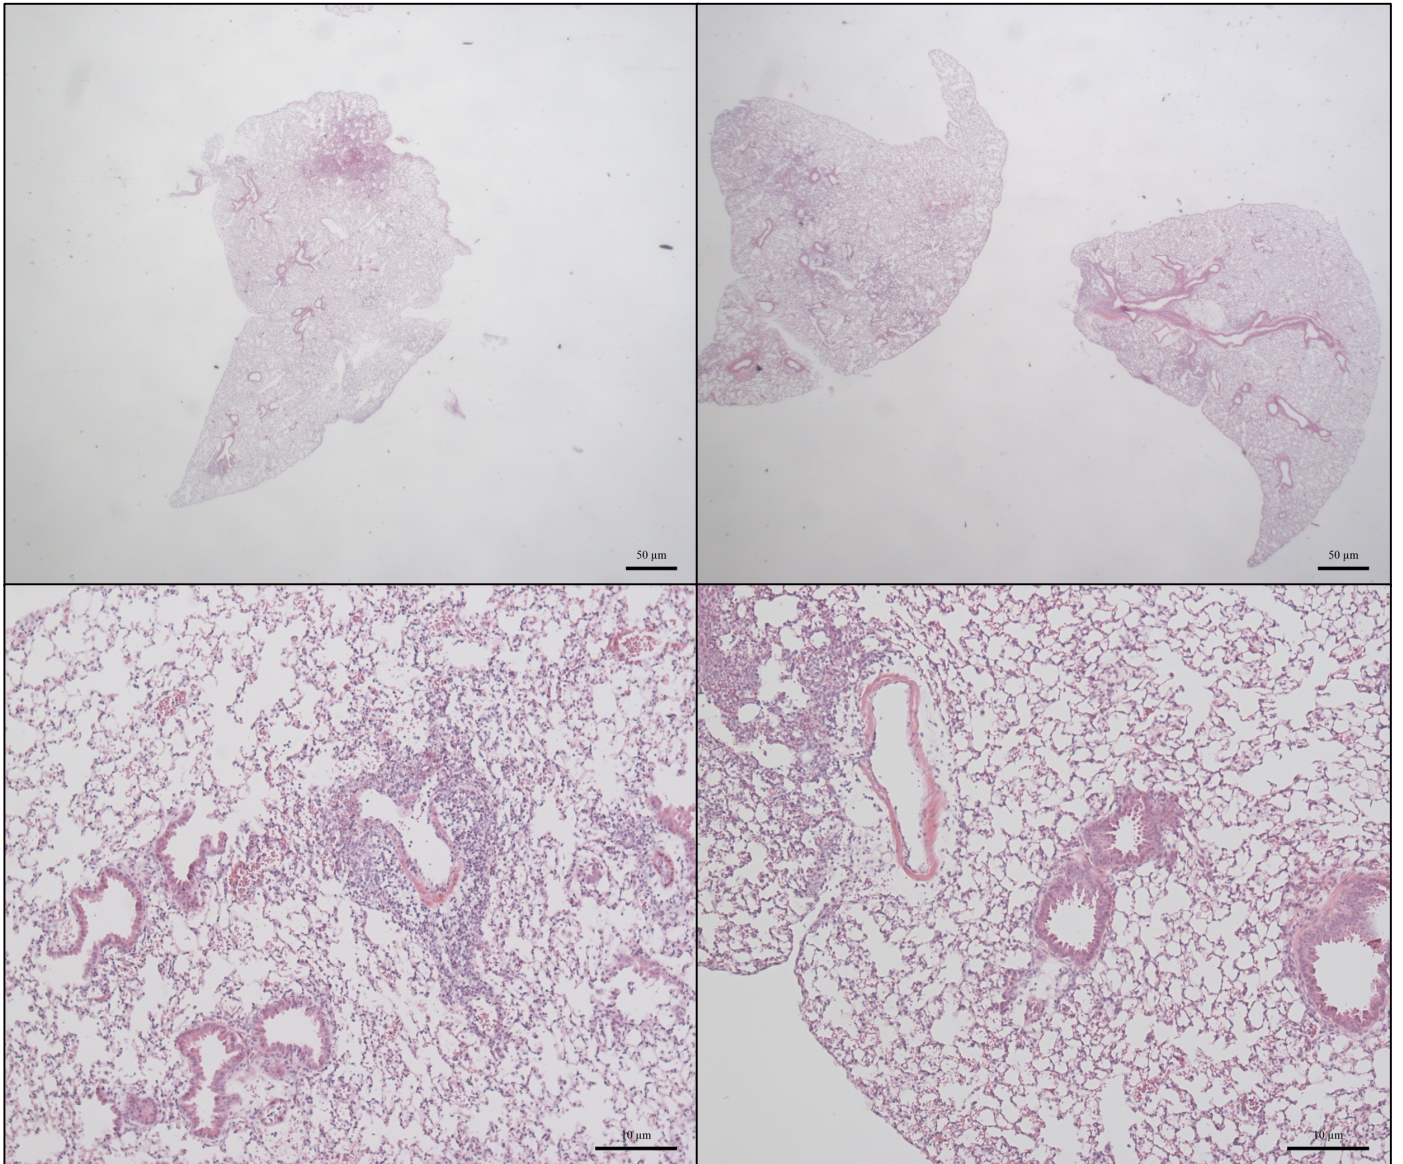



**B****Day 7****WT****KO**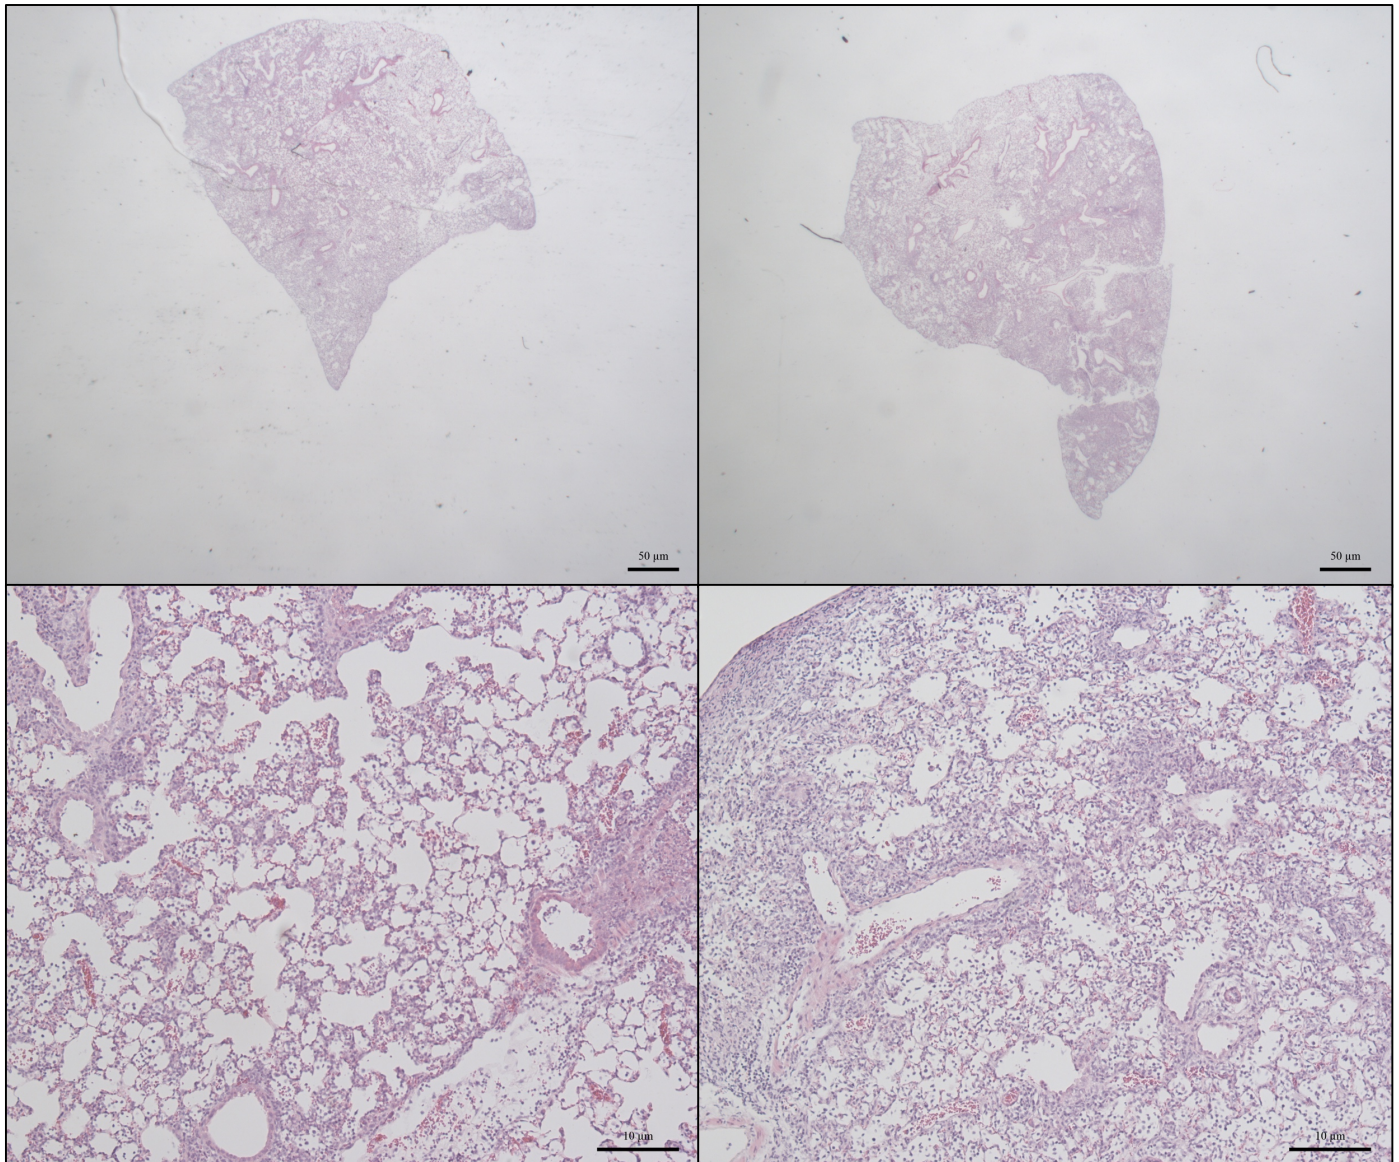

**Supplementary Figure 5. Lung histology of CXCR6<sup>WT</sup> and CXCR6<sup>KO</sup> mice after PR8-P25 infection.** CXCR6<sup>WT</sup> and CXCR6<sup>KO</sup> mice (n=3-5) were infected with PR8-P25 (20 PFU), and hematoxylin and eosin stained lung sections were examined at (A) 3 and (B) 7 days post infection. Representative images at 12.5x (top row, 500 µm scale bar) and 100x (bottom row, 100 µm scale bar) magnification are shown.
